# Supplementary material for: Biological Properties of Fucoxanthin in Oil Recovered from Two Brown Seaweeds Using Supercritical CO2 Extraction
Source: MDPI journal article supplement (doi:10.3390/md13063422), 2015-05-29
Supplement: s1 [file s1]

## Supplementary Information

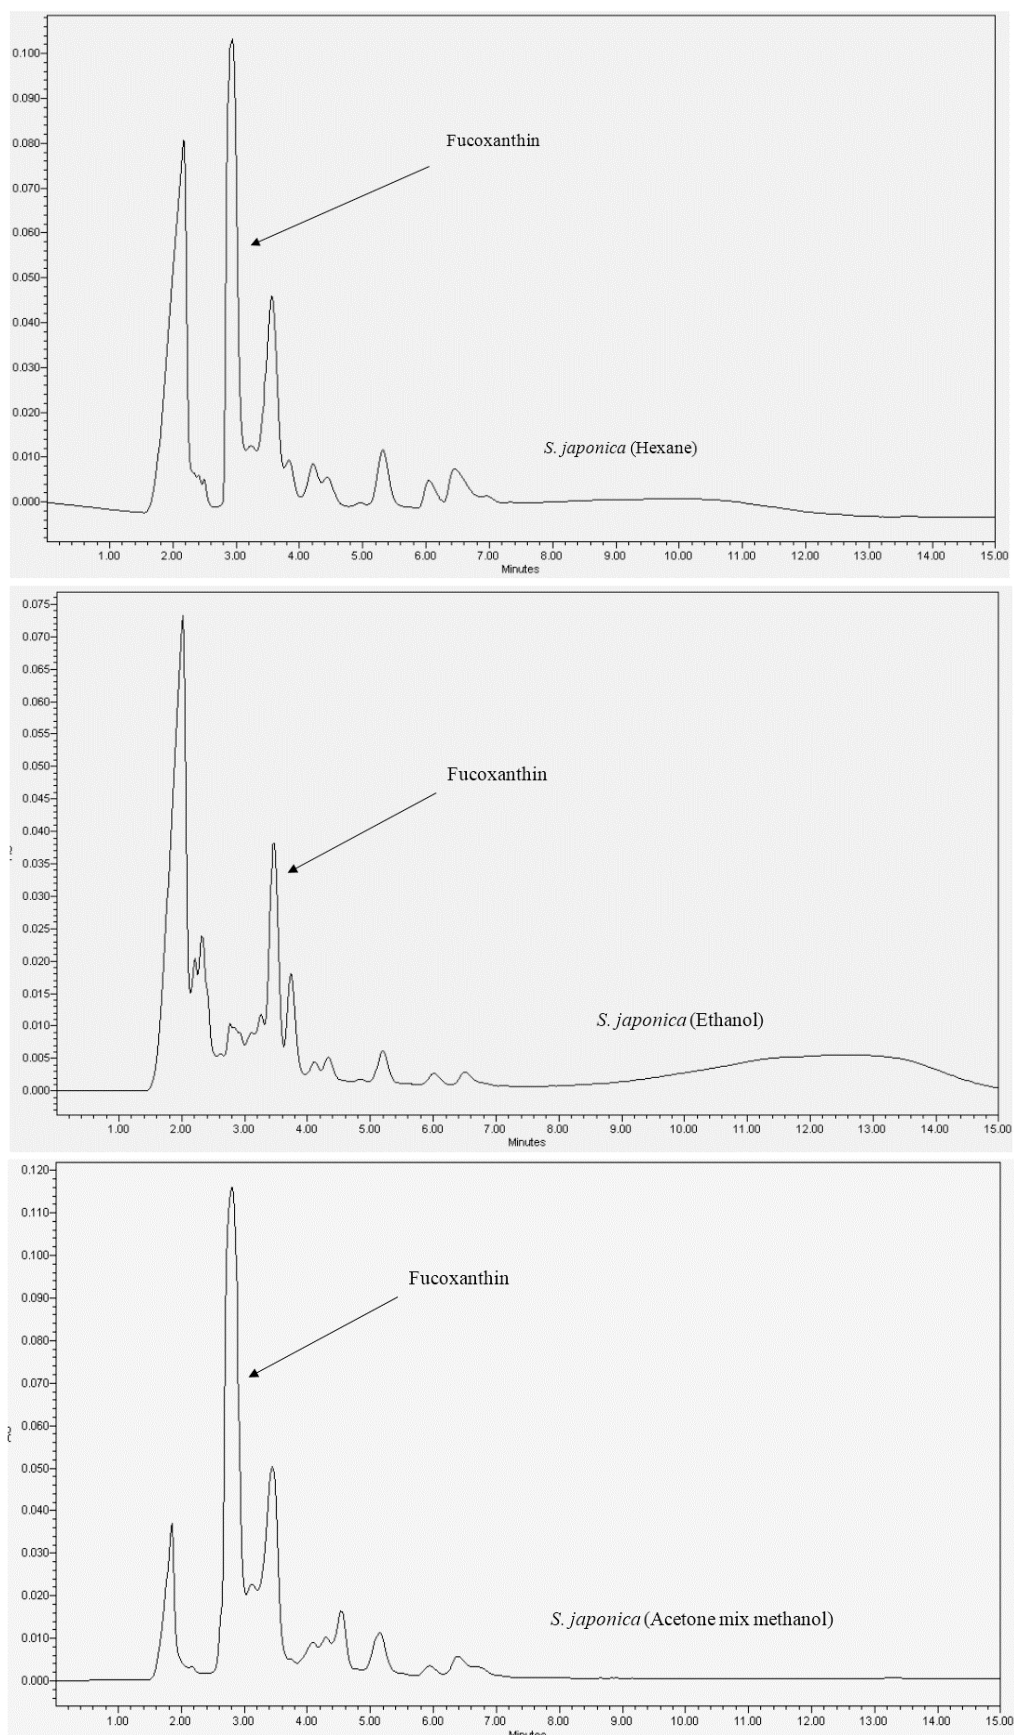

(a)

Figure S1. Cont.

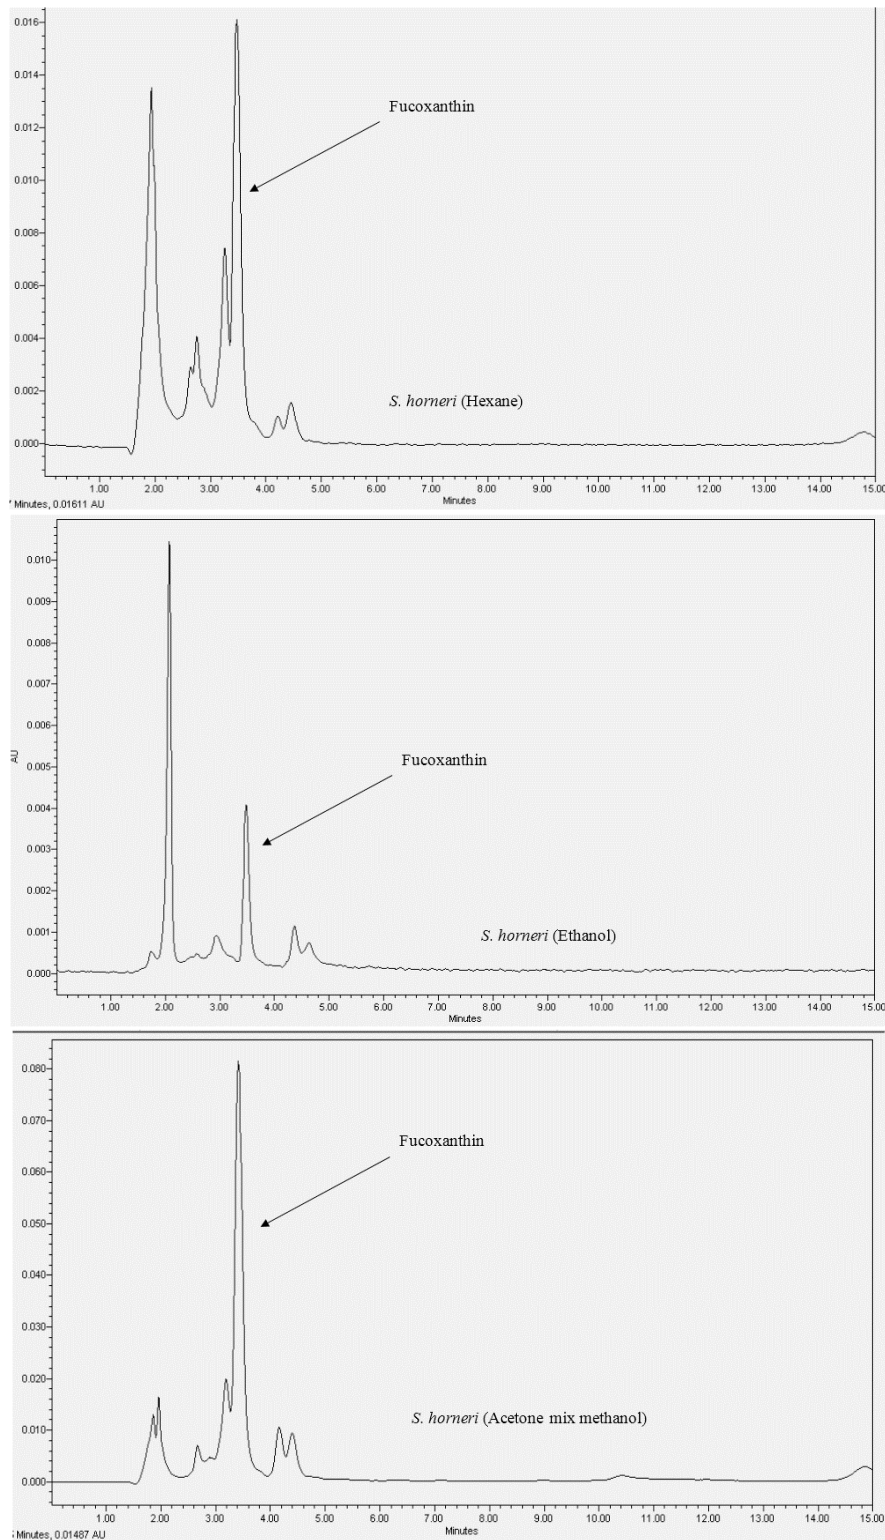

(b)

**Figure S1.** HPLC chromatogram of fucoxanthin content in (a) *S. japonica* using various solvent extraction and (b) *S. horneri* using various solvent extraction.
